# Supplementary material for: Investigation of Volatiles in Cork Samples Using Chromatographic Data and the Superposing Significant Interaction Rules (SSIR) Chemometric Tool
Source: MDPI journal article supplement (doi:10.3390/biom10060896), 2020-06-11
Supplement: s1 [file s1]

**Table S3.** List of samples and the condition of being treated (1) or non-treated (2).  
Peak intensities collected for each sample at the 13 variables (Table 2) selected by SSIR procedure.  
The PCA of this matrix conducted to Figure 3

| Treated? | Sample # | Sample Name         | VARIABLES (those selected by SSIR and listed in Table 2 in the article) |         |         |         |         |         |         |         |        |        |        |        |        |
|----------|----------|---------------------|-------------------------------------------------------------------------|---------|---------|---------|---------|---------|---------|---------|--------|--------|--------|--------|--------|
|          |          |                     | 1                                                                       | 2       | 3       | 4       | 5       | 6       | 7       | 8       | 9      | 10     | 11     | 12     | 13     |
| 0        | 1        | mostra1             | 282761                                                                  | 27825   | 107916  | 100805  | 150130  | 169717  | 112465  | 384456  | 107368 | 77737  | 75338  | 656060 | 797619 |
| 0        | 2        | mostra2             | 267241                                                                  | 16078   | 132987  | 97932   | 153002  | 161529  | 105960  | 400174  | 117438 | 83260  | 70084  | 597361 | 711735 |
| 0        | 3        | mostra3             | 244674                                                                  | 3329    | 89818   | 59055   | 121685  | 112781  | 81899   | 353461  | 111414 | 60734  | 51276  | 699808 | 730133 |
| 0        | 4        | mostra4             | 156356                                                                  | 3722    | 64579   | 49074   | 86849   | 71972   | 71963   | 255841  | 98669  | 57188  | 32498  | 901641 | 915849 |
| 0        | 5        | mostra5             | 236643                                                                  | 5015    | 71887   | 59706   | 113884  | 112893  | 74323   | 333973  | 79736  | 58648  | 51832  | 786274 | 782036 |
| 0        | 6        | mostra6             | 484259                                                                  | 3512    | 207392  | 184314  | 194728  | 279007  | 66304   | 544537  | 175593 | 114139 | 119254 | 996394 | 898664 |
| 0        | 7        | mostra7             | 252712                                                                  | 4027    | 110312  | 87958   | 112604  | 109890  | 86118   | 347049  | 141620 | 76535  | 47948  | 713432 | 729052 |
| 0        | 8        | mostra8             | 305180                                                                  | 17950   | 149776  | 141102  | 151407  | 213871  | 76698   | 387314  | 171041 | 89396  | 89088  | 503038 | 491692 |
| 0        | 9        | mostra9abans        | 128002                                                                  | 108103  | 108682  | 115826  | 85647   | 98945   | 123030  | 167298  | 121609 | 66599  | 56369  | 397112 | 483718 |
| 0        | 10       | mostra10abans       | 85573                                                                   | 51738   | 64967   | 67909   | 74598   | 88483   | 89734   | 139531  | 124856 | 42839  | 45897  | 528207 | 654045 |
| 0        | 11       | mostra11abans       | 132198                                                                  | 120630  | 89700   | 128996  | 103675  | 116518  | 139754  | 180244  | 112364 | 49193  | 63787  | 430501 | 528316 |
| 0        | 12       | mostra12abans       | 59693                                                                   | 9494    | 47663   | 119385  | 56578   | 53624   | 58852   | 120221  | 102110 | 39130  | 33415  | 522375 | 587333 |
| 0        | 31       | mostra121NRNOCD     | 175770                                                                  | 304795  | 49288   | 47667   | 276730  | 62419   | 731655  | 372207  | 50239  | 48400  | 33344  | 19002  | 25510  |
| 0        | 32       | mostra121RNOCD      | 248643                                                                  | 516026  | 72957   | 62733   | 290629  | 100598  | 891387  | 557651  | 54885  | 62659  | 50560  | 31624  | 73126  |
| 0        | 34       | mostra129NRNOCD     | 445614                                                                  | 537867  | 70533   | 72905   | 342718  | 161691  | 647736  | 626585  | 94909  | 96090  | 71774  | 24077  | 39134  |
| 0        | 35       | mostra90NRNOCD      | 303581                                                                  | 436808  | 88407   | 85310   | 439506  | 115943  | 789168  | 894085  | 89061  | 91848  | 50547  | 22355  | 47010  |
| 0        | 36       | mostra90RNOCD       | 557662                                                                  | 909713  | 128136  | 123152  | 493846  | 208386  | 1209322 | 776010  | 128834 | 133216 | 94151  | 22948  | 39230  |
| 0        | 37       | mostra99NRNOCD      | 217876                                                                  | 94904   | 33894   | 32071   | 341974  | 96308   | 457782  | 500715  | 64845  | 66491  | 50827  | 37989  | 55935  |
| 0        | 38       | mostra99RNOCD       | 314817                                                                  | 963943  | 114137  | 106716  | 385891  | 111945  | 984690  | 525921  | 68030  | 69678  | 52053  | 23823  | 32109  |
| 0        | 40       | mostra46R-NOCD      | 326817                                                                  | 207362  | 61750   | 61171   | 749942  | 113550  | 881917  | 1111337 | 75469  | 71951  | 50503  | 25314  | 49502  |
| 0        | 42       | mostraCln1NR-NOCD   | 58636                                                                   | 40371   | 23313   | 19781   | 666869  | 41413   | 910299  | 390880  | 34330  | 34607  | 21424  | 30317  | 71549  |
| 0        | 44       | mostraCln2NR-NOCD   | 273012                                                                  | 94475   | 29562   | 27032   | 171913  | 139984  | 966441  | 472957  | 74548  | 74629  | 58764  | 31154  | 58685  |
| 0        | 46       | mostrad28NR-NOCD    | 383105                                                                  | 316584  | 75565   | 72008   | 367289  | 132325  | 652761  | 708814  | 115434 | 111701 | 67614  | 31510  | 51074  |
| 0        | 48       | mostraHDn1HDNR-NOCD | 365625                                                                  | 576233  | 75590   | 67196   | 419627  | 138398  | 1088992 | 564918  | 97356  | 97905  | 65443  | 29737  | 61744  |
| 0        | 50       | mostraHDn1TZNR-NOCD | 159487                                                                  | 300440  | 40961   | 40206   | 320805  | 76354   | 621954  | 437340  | 41926  | 43007  | 32513  | 29313  | 39744  |
| 0        | 51       | mostraHDn2HDNR-NOCD | 254538                                                                  | 88848   | 42678   | 39475   | 318301  | 99834   | 1168968 | 459878  | 96720  | 98324  | 54221  | 34414  | 62242  |
| 0        | 52       | mostraHDn2TZNR-NOCD | 387785                                                                  | 101223  | 45990   | 46568   | 354150  | 141194  | 810981  | 540290  | 113014 | 119046 | 68223  | 30254  | 55956  |
| 0        | 54       | mostraCCM-NR-NOCD   | 350332                                                                  | 87854   | 36828   | 31110   | 152133  | 112747  | 346606  | 573775  | 103091 | 105641 | 52894  | 36972  | 53184  |
| 1        | 13       | mostra1desp         | 1830487                                                                 | 2227804 | 1080470 | 1036903 | 1058752 | 1886769 | 2034049 | 1743283 | 370455 | 322757 | 752485 | 380548 | 360411 |
| 1        | 14       | mostra2desp         | 1718749                                                                 | 2596000 | 1075832 | 996467  | 1031285 | 1880699 | 2419732 | 1604407 | 351487 | 315635 | 746143 | 199367 | 210501 |
| 1        | 15       | mostra3desp         | 2051783                                                                 | 2446713 | 1094620 | 1054801 | 1138935 | 2071230 | 2264314 | 1970506 | 354948 | 322717 | 842916 | 397010 | 357943 |
| 1        | 16       | mostra4desp         | 1928216                                                                 | 1568957 | 1026886 | 993673  | 1046240 | 1916569 | 1356214 | 1845514 | 370819 | 324548 | 791689 | 232233 | 283202 |
| 1        | 17       | mostra5desp         | 1942142                                                                 | 1300501 | 877617  | 847641  | 1013575 | 1797328 | 1188052 | 1816075 | 344603 | 301959 | 696467 | 362814 | 426233 |
| 1        | 18       | mostra6desp         | 760010                                                                  | 1.2E+07 | 900083  | 966633  | 526453  | 632544  | 7225120 | 566343  | 265538 | 211351 | 380755 | 368237 | 507671 |
| 1        | 19       | mostra7desp         | 1030485                                                                 | 1.7E+07 | 1535715 | 1719024 | 839077  | 919624  | 1E+07   | 727132  | 410400 | 323343 | 605359 | 245649 | 302697 |
| 1        | 20       | mostra8desp         | 1042508                                                                 | 1.3E+07 | 1316726 | 1478726 | 943003  | 983714  | 8077439 | 726391  | 375925 | 302970 | 664662 | 162571 | 228545 |
| 1        | 21       | mostra9desp         | 763593                                                                  | 5995299 | 570104  | 707550  | 587380  | 660553  | 3801051 | 564804  | 209296 | 161626 | 466018 | 410611 | 412074 |
| 1        | 22       | mostra10desp        | 975793                                                                  | 8502012 | 892562  | 1109612 | 800276  | 889211  | 5307597 | 704249  | 288323 | 220467 | 615135 | 345759 | 377548 |
| 1        | 23       | mostra11desp        | 769091                                                                  | 8043047 | 739372  | 839659  | 611792  | 698559  | 5161735 | 568778  | 245882 | 189342 | 454968 | 309761 | 368433 |
| 1        | 24       | mostra12desp        | 209786                                                                  | 9386040 | 623004  | 704481  | 269520  | 143519  | 6460804 | 398822  | 129546 | 107244 | 85335  | 244862 | 239854 |
| 1        | 25       | mostra121NR         | 892567                                                                  | 483958  | 202662  | 196398  | 573044  | 289909  | 1886067 | 973225  | 378819 | 378271 | 135341 | 32323  | 50096  |
| 1        | 26       | mostra121R          | 975283                                                                  | 612721  | 215535  | 211337  | 594322  | 352043  | 1449482 | 1005940 | 415846 | 413988 | 147429 | 25323  | 33265  |
| 1        | 27       | mostra90NR          | 1034690                                                                 | 2478837 | 571429  | 571445  | 524254  | 374108  | 2246581 | 1109371 | 472354 | 476772 | 165993 | 29475  | 36402  |
| 1        | 28       | mostra90R           | 975474                                                                  | 1126194 | 432730  | 421324  | 529902  | 393522  | 1918034 | 1117023 | 486466 | 509984 | 175185 | 34806  | 41778  |
| 1        | 29       | mostra99R           | 1221289                                                                 | 2494134 | 522406  | 517392  | 472452  | 328475  | 2305242 | 1233927 | 532869 | 531311 | 158663 | 25985  | 35459  |
| 1        | 30       | mostra99NR          | 1803340                                                                 | 2738087 | 888168  | 893380  | 918870  | 658155  | 2575790 | 1924879 | 840602 | 836216 | 294077 | 28798  | 32730  |
| 1        | 33       | mostra129NR1xCD     | 1079549                                                                 | 3449410 | 579910  | 578132  | 372513  | 333918  | 3152968 | 997207  | 444203 | 444309 | 155916 | 25283  | 29687  |
| 1        | 39       | mostra46R-1xCD      | 1891319                                                                 | 4702483 | 739936  | 734679  | 580241  | 561265  | 4115782 | 1722662 | 705871 | 708591 | 243751 | 26373  | 36158  |
| 1        | 41       | mostraCln1-1xCD     | 1245107                                                                 | 2983441 | 576019  | 564221  | 574542  | 365049  | 2757619 | 1373097 | 471678 | 482523 | 173233 | 21072  | 29833  |
| 1        | 43       | mostraCln2-1xCD     | 1567464                                                                 | 2537303 | 628374  | 612079  | 600537  | 658726  | 2603503 | 1425137 | 682127 | 696602 | 292493 | 31758  | 47559  |
| 1        | 45       | mostrad28NR-1xCD    | 1545221                                                                 | 2607422 | 594861  | 597901  | 555878  | 526339  | 2258422 | 1750112 | 642844 | 661231 | 222370 | 28046  | 35819  |
| 1        | 47       | mostraHDn1HDNR-1xCD | 1415106                                                                 | 3120893 | 553254  | 561056  | 505513  | 434241  | 2917474 | 1544540 | 525800 | 522786 | 195821 | 25768  | 30914  |
| 1        | 49       | mostraHDn1TZNR-1xCD | 1306366                                                                 | 1251769 | 387254  | 375099  | 779201  | 502019  | 1470483 | 1313331 | 638793 | 652035 | 227648 | 32997  | 54876  |
| 1        | 53       | mostraCCM-NR-1xCD   | 920056                                                                  | 3805946 | 584254  | 566709  | 382188  | 313699  | 3513864 | 891287  | 374033 | 369332 | 144044 | 19490  | 25839  |
| 1        | 55       | mostraHDn2HDNR-1xCD | 949547                                                                  | 3583815 | 617167  | 614489  | 779487  | 297333  | 3520196 | 1241516 | 393377 | 395627 | 143073 | 20544  | 50596  |
| 1        | 56       | mostraHDn2TZNR-1xCD | 1199301                                                                 | 996768  | 287798  | 291279  | 678273  | 426082  | 1389284 | 1465372 | 561674 | 567370 | 192916 | 35493  | 56099  |
