# Supplementary material for: Investigation of Volatiles in Cork Samples Using Chromatographic Data and the Superposing Significant Interaction Rules (SSIR) Chemometric Tool
Source: MDPI journal article supplement (doi:10.3390/biom10060896), 2020-06-11
Supplement: s1 [file s1]

**Table S1.** List of samples and the condition of being treated (1) or non-treated (0).  
Area ratios for each target compound used in the first manual inspection and in the first PCA analysis, conducting to Figure 1.

| Treated? | Sample # | Sample Name         | eucalyptol | guaiacol | fenchol | veratrole | camphor | borneol | alfa-terpineol | benzothiazol | TCA      |
|----------|----------|---------------------|------------|----------|---------|-----------|---------|---------|----------------|--------------|----------|
| 0        | 1        | mostra1             | 0.57588    | 0.11150  | 0.05935 | 0.23544   | 1.35635 | 0.10809 | 0.95009        | 0.21555      | 0.09660  |
| 0        | 2        | mostra2             | 0.24821    | 0.10870  | 0.06367 | 0.15707   | 1.91469 | 0.24704 | 1.22721        | 0.21812      | 0.08790  |
| 0        | 3        | mostra3             | 0.50209    | 0.06357  | 0.06154 | 0.17601   | 1.51853 | 0.13519 | 1.06950        | 0.21055      | 0.09679  |
| 0        | 4        | mostra4             | 0.86369    | 0.09892  | 0.08091 | 0.26488   | 2.04501 | 0.23370 | 1.85446        | 0.27210      | 0.10871  |
| 0        | 5        | mostra5             | 0.76147    | 0.13796  | 0.05898 | 0.09026   | 1.76323 | 0.13631 | 1.10205        | 11.15134     | 0.10056  |
| 0        | 6        | mostra6             | 0.91331    | 0.12535  | 0.09906 | 0.16019   | 2.07963 | 0.26898 | 1.41920        | 12.50908     | 0.10920  |
| 0        | 7        | mostra7             | 0.59877    | 0.19397  | 0.06745 | 0.16641   | 1.58457 | 0.14623 | 1.28770        | 5.35578      | 0.11421  |
| 0        | 8        | mostra8             | 0.43221    | 0.42509  | 0.11593 | 0.39311   | 2.46742 | 0.40745 | 2.51005        | 0.41660      | 0.14408  |
| 0        | 9        | mostra9abans        | 0.31215    | 0.12447  | 0.07670 | 0.20843   | 0.94566 | 0.07031 | 0.55576        | 0.63442      | 0.14436  |
| 0        | 10       | mostra10abans       | 0.56243    | 0.08113  | 0.13819 | 0.28210   | 1.43779 | 0.10135 | 0.86921        | 0.97600      | 0.14482  |
| 0        | 11       | mostra11abans       | 0.39603    | 0.21715  | 0.09873 | 0.17232   | 0.94467 | 0.09559 | 0.58335        | 4.70218      | 0.13217  |
| 0        | 12       | mostra12abans       | 0.68349    | 0.25974  | 0.09487 | 0.23746   | 1.02172 | 0.07345 | 0.65759        | 1.19706      | 0.11940  |
| 0        | 31       | mostra121NRNOCD     | 0.08362    | 1.08711  | 0.09075 | 0.10769   | 1.10691 | 0.47239 | 0.76960        | 0.74948      | 0.06030  |
| 0        | 32       | mostra121RNOCD      | 0.06733    | 2.26392  | 0.07678 | 0.14824   | 1.13118 | 0.43788 | 0.80188        | 1.19039      | 0.11706  |
| 0        | 34       | mostra129NRNOCD     | 0.20555    | 1.07848  | 0.03392 | 0.20015   | 1.24166 | 0.30579 | 0.58796        | 0.65504      | 0.18826  |
| 0        | 35       | mostra90NRNOCD      | 0.34783    | 1.67887  | 0.06514 | 0.23312   | 1.98627 | 0.47018 | 1.41024        | 1.16501      | 0.05047  |
| 0        | 36       | mostra90RNOCD       | 0.41868    | 1.90816  | 0.06384 | 0.50324   | 1.60150 | 0.34441 | 1.13314        | 0.64640      | 11.87900 |
| 0        | 37       | mostra99NRNOCD      | 0.55040    | 0.87796  | 0.06731 | 0.33313   | 1.95998 | 0.24586 | 0.57779        | 0.66149      | 0.10125  |
| 0        | 38       | mostra99RNOCD       | 0.38102    | 1.58348  | 0.09852 | 0.29480   | 1.92001 | 0.48913 | 1.08807        | 0.84560      | 0.38197  |
| 0        | 40       | mostra46R-NOCD      | 0.52547    | 0.94330  | 0.14100 | 0.20100   | 2.05378 | 0.59884 | 3.15605        | 0.89019      | 0.09257  |
| 0        | 42       | mostraCln1NR-NOCD   | 0.13340    | 0.44504  | 0.03366 | 0.28538   | 0.69702 | 0.14615 | 0.14107        | 3.09035      | 0.06629  |
| 0        | 44       | mostraCln2NR-NOCD   | 0.08002    | 0.12306  | 0.03909 | 0.21980   | 0.60219 | 0.21474 | 0.10873        | 1.66371      | 0.09430  |
| 0        | 46       | mostrad28NR-NOCD    | 0.36740    | 0.53151  | 0.08475 | 0.11385   | 2.05668 | 0.34031 | 0.63604        | 5.64317      | 0.07780  |
| 0        | 48       | mostraHDn1HDNR-NOCD | 1.30102    | 1.18168  | 0.06280 | 3.33232   | 2.14951 | 0.30330 | 0.73204        | 0.60421      | 0.08545  |
| 0        | 50       | mostraHDn1TZNR-NOCD | 0.34720    | 1.30464  | 0.05000 | 0.14357   | 1.06444 | 0.25147 | 0.53532        | 0.90635      | 0.04272  |
| 0        | 51       | mostraHDn2HDNR-NOCD | 0.19442    | 0.87101  | 0.10100 | 0.23766   | 1.55930 | 0.43269 | 0.77219        | 0.59219      | 0.04797  |
| 0        | 52       | mostraHDn2TZNR-NOCD | 0.67314    | 0.81134  | 0.08069 | 0.43219   | 2.11772 | 0.32425 | 1.14002        | 3.62931      | 0.05250  |
| 0        | 54       | mostraCCM-NR-NOCD   | 0.71754    | 0.90145  | 0.08735 | 0.19615   | 2.28837 | 0.39323 | 0.93660        | 1.07450      | 0.06884  |
| 1        | 13       | mostra1desp         | 0.85777    | 0.30576  | 0.05780 | 0.22513   | 1.61801 | 0.24226 | 2.04841        | 3.96695      | 0.09894  |
| 1        | 14       | mostra2desp         | 1.25816    | 0.34826  | 0.07693 | 0.53362   | 2.91567 | 0.54455 | 2.83415        | 0.99716      | 0.11143  |
| 1        | 15       | mostra3desp         | 0.62074    | 0.15314  | 0.05095 | 0.30176   | 1.51864 | 0.21940 | 1.61639        | 5.47738      | 0.32688  |
| 1        | 16       | mostra4desp         | 1.20746    | 0.23683  | 0.09460 | 0.39980   | 3.03318 | 0.30107 | 2.95377        | 1.80377      | 0.14101  |
| 1        | 17       | mostra5desp         | 1.36801    | 0.19311  | 0.10043 | 0.20050   | 2.40644 | 0.23974 | 2.28521        | 0.98585      | 0.11019  |
| 1        | 18       | mostra6desp         | 0.41738    | 0.17004  | 0.06689 | 0.16263   | 0.74344 | 0.06283 | 0.47235        | 0.23155      | 0.14199  |
| 1        | 19       | mostra7desp         | 1.22441    | 0.34362  | 0.13086 | 0.17547   | 1.81033 | 0.17339 | 0.84610        | 0.29550      | 0.11445  |
| 1        | 20       | mostra8desp         | 0.98172    | 0.48481  | 0.13821 | 0.24126   | 1.60709 | 0.22139 | 1.00719        | 0.41959      | 0.14816  |
| 1        | 21       | mostra9desp         | 0.41734    | 0.10418  | 0.05743 | 0.12328   | 0.66093 | 0.06854 | 0.37368        | 0.34424      | 0.10642  |
| 1        | 22       | mostra10desp        | 0.48000    | 0.09134  | 0.06248 | 0.15324   | 0.70506 | 0.10968 | 0.36705        | 0.34518      | 0.10036  |
| 1        | 23       | mostra11desp        | 0.50128    | 0.12628  | 0.07370 | 0.19460   | 0.90287 | 0.09397 | 0.67889        | 0.39946      | 0.10598  |
| 1        | 24       | mostra12desp        | 0.49560    | 0.08791  | 0.09396 | 0.15170   | 0.89198 | 0.36283 | 0.62304        | 0.24779      | 0.36573  |
| 1        | 25       | mostra121NR         | 0.04865    | 1.13097  | 0.08921 | 0.09338   | 0.96505 | 0.44267 | 1.01606        | 0.47132      | 0.05260  |
| 1        | 26       | mostra121R          | 0.04501    | 0.31327  | 0.04338 | 0.08101   | 0.42528 | 0.25451 | 0.61807        | 0.34795      | 0.09980  |
| 1        | 27       | mostra90NR          | 0.00000    | 1.34508  | 0.00000 | 0.28213   | 0.48313 | 0.22178 | 0.57982        | 0.73604      | 0.05693  |
| 1        | 28       | mostra90R           | 0.10666    | 1.25527  | 0.07831 | 0.29605   | 1.03837 | 0.57395 | 1.48560        | 1.10322      | 0.05069  |
| 1        | 29       | mostra99R           | 0.09959    | 1.29892  | 0.04052 | 0.39940   | 0.83175 | 0.20687 | 0.63870        | 0.51499      | 0.04975  |
| 1        | 30       | mostra99NR          | 0.13034    | 1.41549  | 0.05281 | 0.37080   | 1.21692 | 0.33565 | 0.71233        | 0.67373      | 0.05823  |
| 1        | 33       | mostra129NR1xCD     | 0.08676    | 1.83561  | 0.06456 | 0.05578   | 0.83540 | 0.38353 | 0.74417        | 20.78618     | 0.10782  |
| 1        | 39       | mostra46R-1xCD      | 0.12592    | 1.16645  | 0.05510 | 0.15149   | 1.21462 | 0.32784 | 0.95352        | 0.49524      | 0.11387  |
| 1        | 41       | mostraCln1-1xCD     | 0.13785    | 0.49672  | 0.02616 | 0.15018   | 0.70146 | 0.18823 | 0.15693        | 0.95800      | 0.06617  |
| 1        | 43       | mostraCln2-1xCD     | 0.40320    | 0.35656  | 0.03905 | 0.12331   | 0.78060 | 0.18213 | 0.18479        | 0.98315      | 0.07305  |
| 1        | 45       | mostrad28NR-1xCD    | 0.11432    | 0.72909  | 0.08586 | 0.25356   | 1.01599 | 0.41762 | 0.07983        | 0.40296      | 0.03740  |
| 1        | 47       | mostraHDn1HDNR-1xCD | 0.30376    | 1.19408  | 0.07047 | 0.42652   | 1.37416 | 0.26429 | 0.45154        | 0.40673      | 0.05959  |
| 1        | 49       | mostraHDn1TZNR-1xCD | 0.20196    | 0.66383  | 0.04024 | 0.16815   | 1.09218 | 0.24614 | 0.46499        | 0.28840      | 0.04440  |
| 1        | 53       | mostraCCM-NR-1xCD   | 0.14178    | 0.54809  | 0.05897 | 0.08598   | 1.55052 | 0.30929 | 0.82986        | 0.55619      | 0.12248  |
| 1        | 55       | mostraHDn2HDNR-1xCD | 0.23187    | 0.55663  | 0.10797 | 0.29985   | 1.21401 | 0.48678 | 0.91093        | 1.01363      | 0.06859  |
| 1        | 56       | mostraHDn2TZNR-1xCD | 0.72818    | 0.47670  | 0.15019 | 0.17973   | 3.19026 | 0.52655 | 1.30601        | 0.38977      | 0.16907  |
